# Supplementary material for: Potential Therapeutic and Prognostic Values of LSM Family Genes in Breast Cancer
Source: MDPI journal article supplement (doi:10.3390/cancers13194902), 2021-09-29
Supplement: s1 [file s1]

# Supplementary data

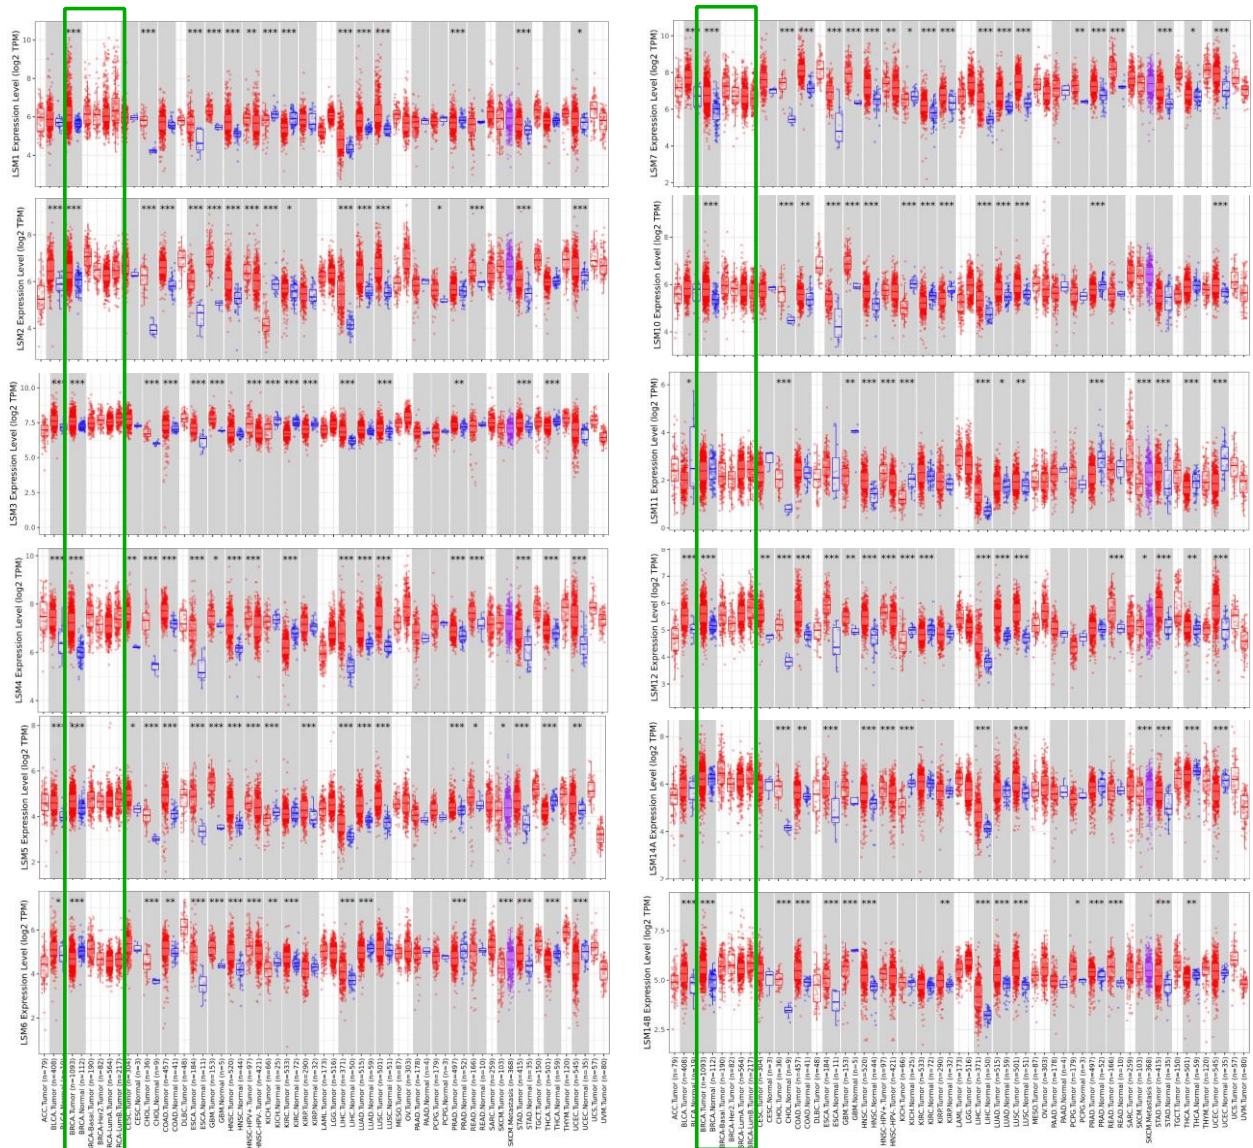

**Figure S1. LSM family genes expression in several cancer types.** Box plots display differential gene expression levels (Log2 TPM) of LSM family members between tumors and normal tissues from TCGA dataset. Blue boxes show normal samples, and red boxes indicate tumor tissues. Wilcoxon test was used to evaluate the statistical significance. \*  $p < 0.05$ ; \*\*  $p < 0.01$ ; \*\*\*  $p < 0.001$

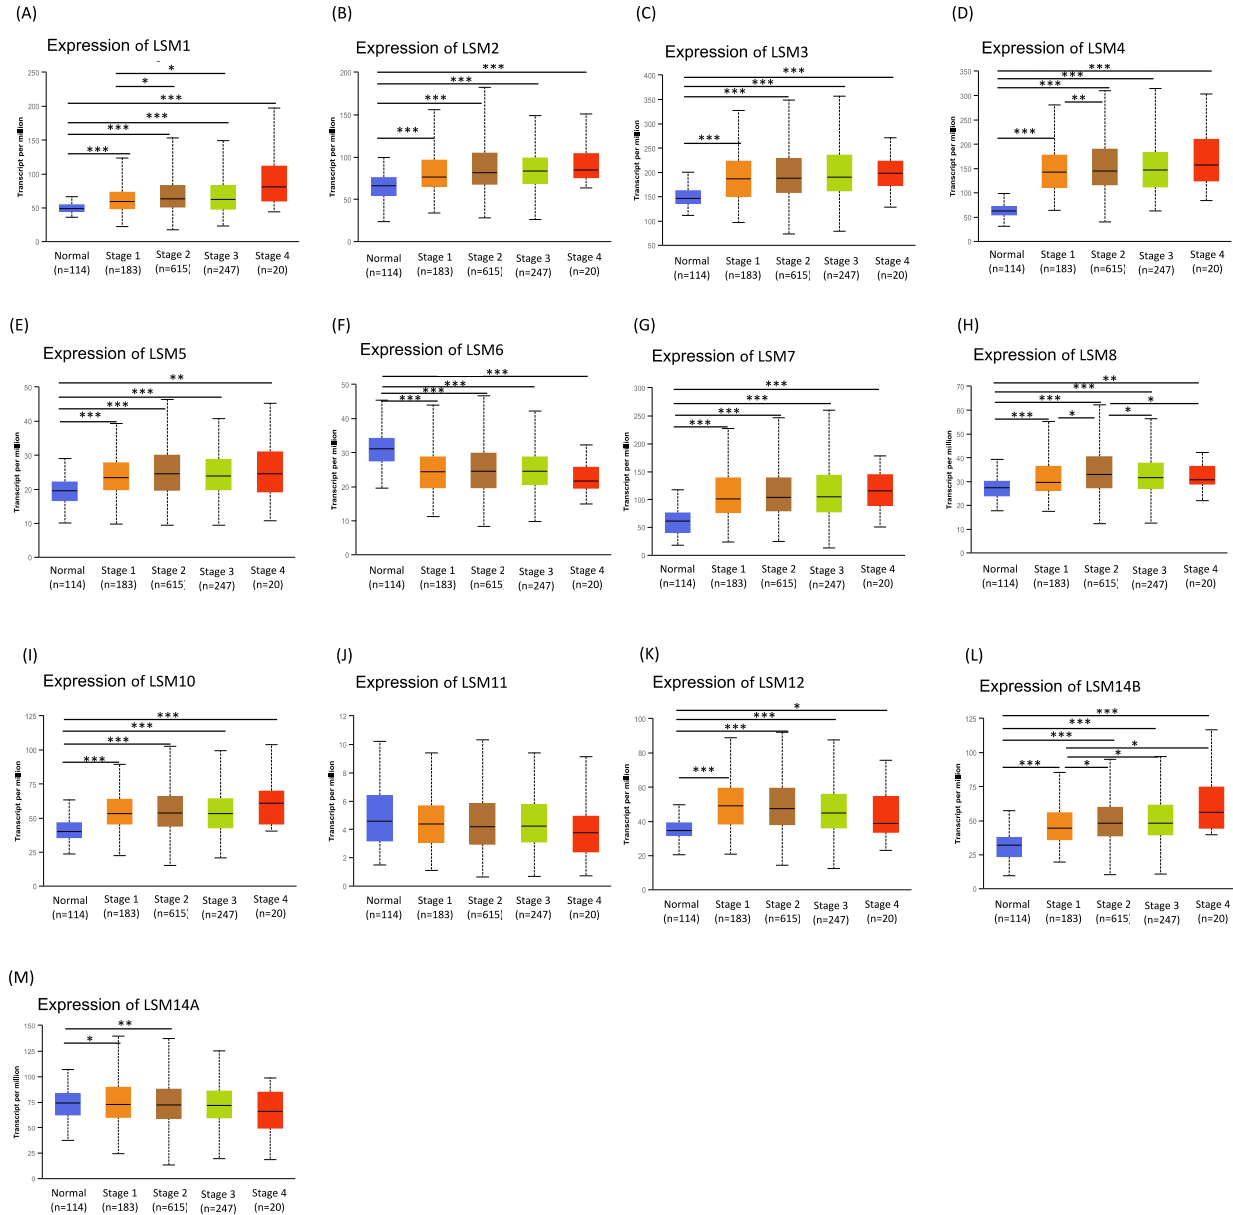

**Figure S2. LSMs transcription levels in different stages of breast cancer (UALCAN database).** In the TCGA dataset, there are 114 normal samples, 183 patients at Stage 1, 615 patients at Stage 2, 247 patients at Stage 3, 20 patients at Stage 4. Boxplots showing the relative expression levels of LSM family genes in normal samples and stage 1, 2, 3, 4 of breast cancer. Figures (A)-(M) depicted the expression of LSM family genes (LSM1-LSM14B) in breast cancer patients on individual cancer stages, respectively. Student's t-test was conducted for statistical tests between groups. \* $P < 0.05$ ; \*\* $P < 0.01$ ; \*\*\* $P < 0.001$ .

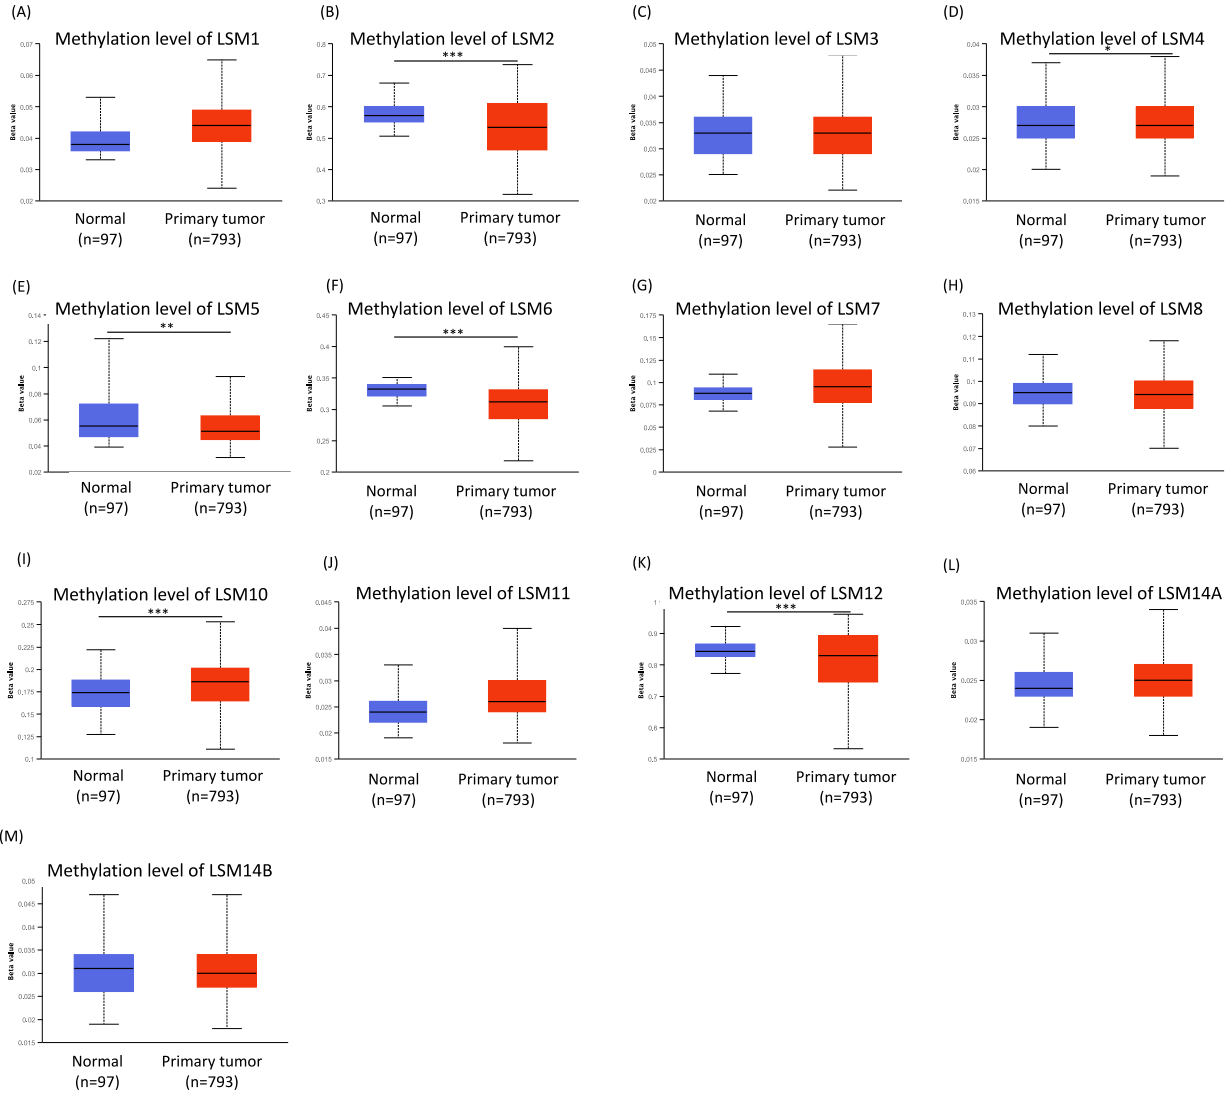

**Figure S3. LSMs DNA methylation level in patients with breast cancer versus healthy controls (UALCAN database, with 97 normal samples and 793 primary tumor samples). P-value <0.05 was considered statistically significant by applying Student's t-test, which showed in red labels. (A)-(M) represented the comparison of methylation level between the normal sample and primary tumor of LSM1-LSM14B, respectively. \*P < 0.05; \*\*P < 0.01; \*\*\*P < 0.001.**

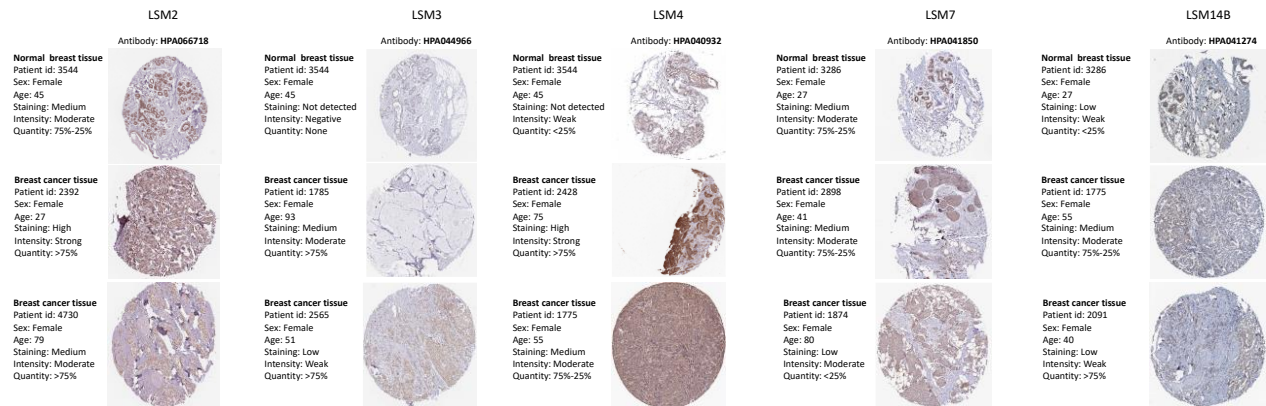

**Figure S4.** Representative immunohistochemistry images of LSM2, LSM3, LSM4, LSM7, LSM14b in breast cancer patients, which showed the normal and tumor samples (Human Protein Atlas), and IHC intensity of these genes as well, respectively. All the IHC images and patient information were obtained from Human Protein Atlas.

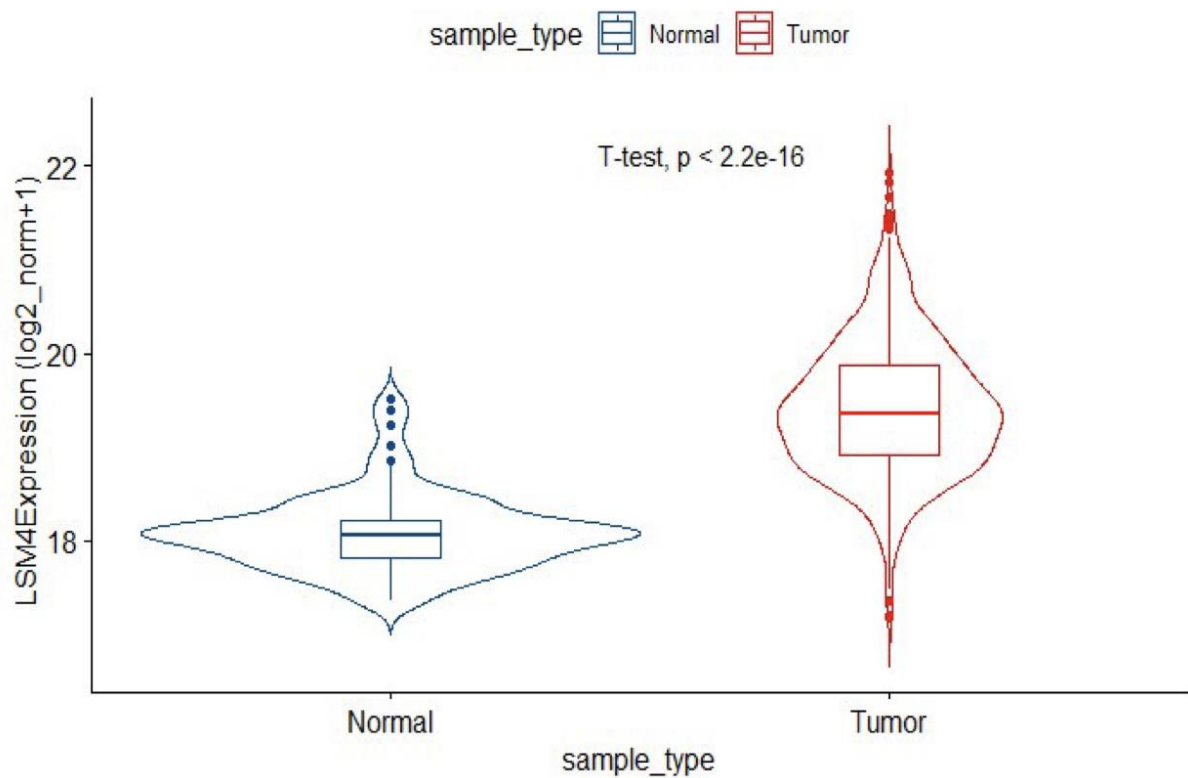

**Figure S5.** LSM4 expression between normal and tumor groups (n=1222 patients from GDC database). Violin plot shows LSM4 expression in both normal and tumor samples. A student's t-test was used and a p-value <0.05 was considered statistically significant.

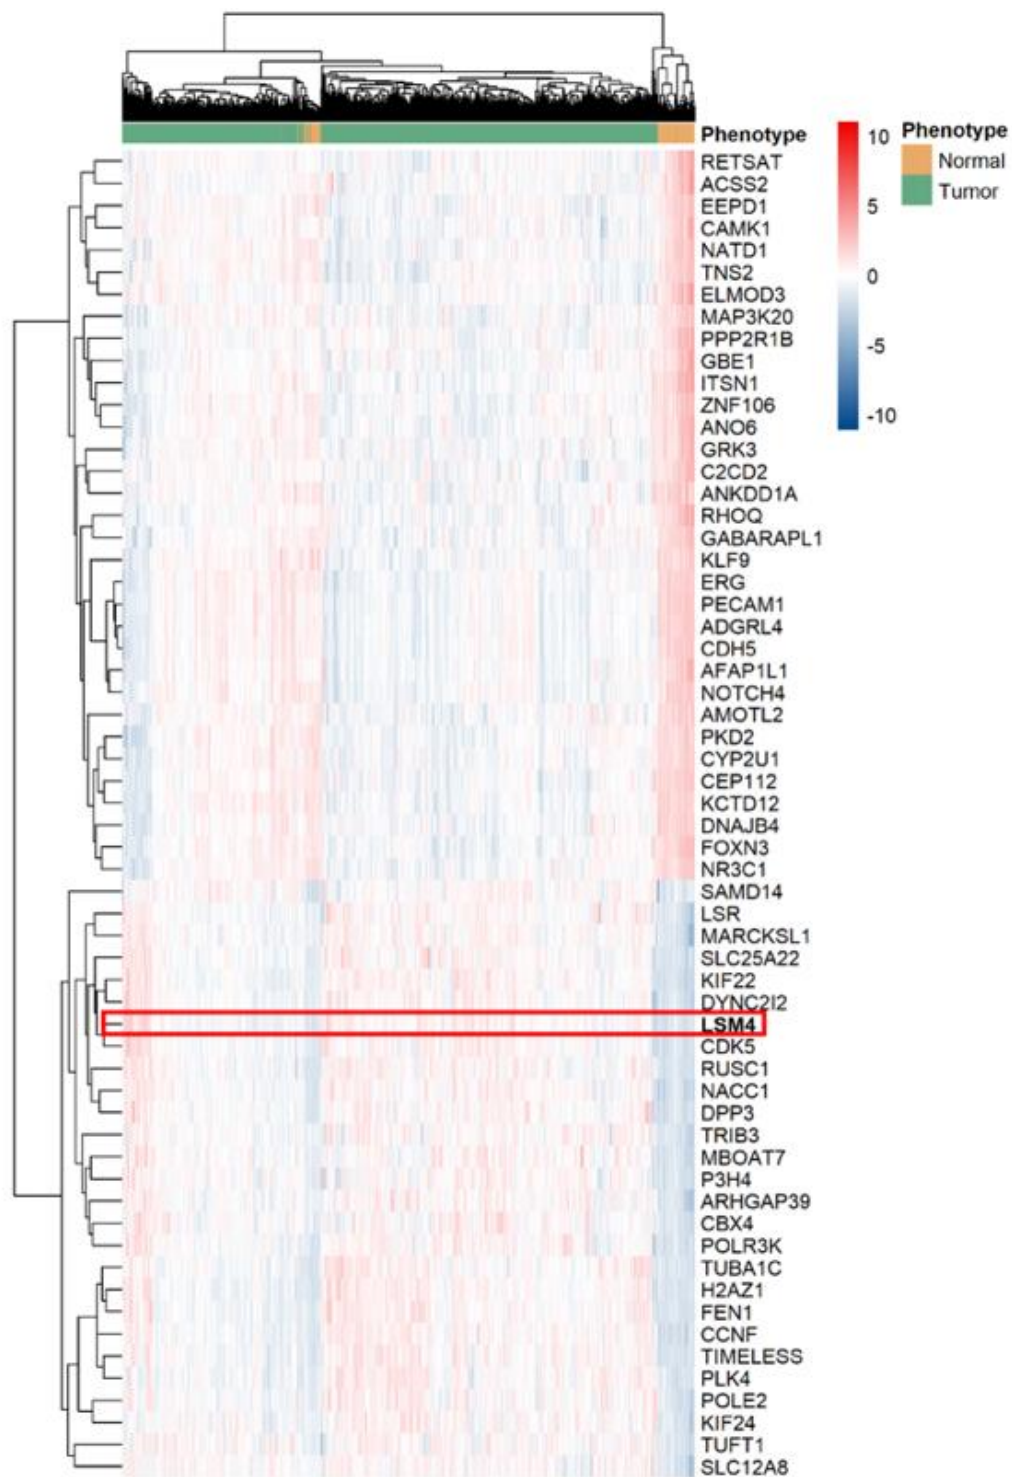

**Figure S6.** Expression profiles of LSM4 in DEGs methods. The platform GPL570 from the GDC dataset consists of 1222 samples of breast cancer patients and 18217 genome data in the form of genes was obtained to plot the Heatmap of top 60 genes based on log2foldchange values. P-values <0.05 and log2FC > 1.5 were set as threshold.

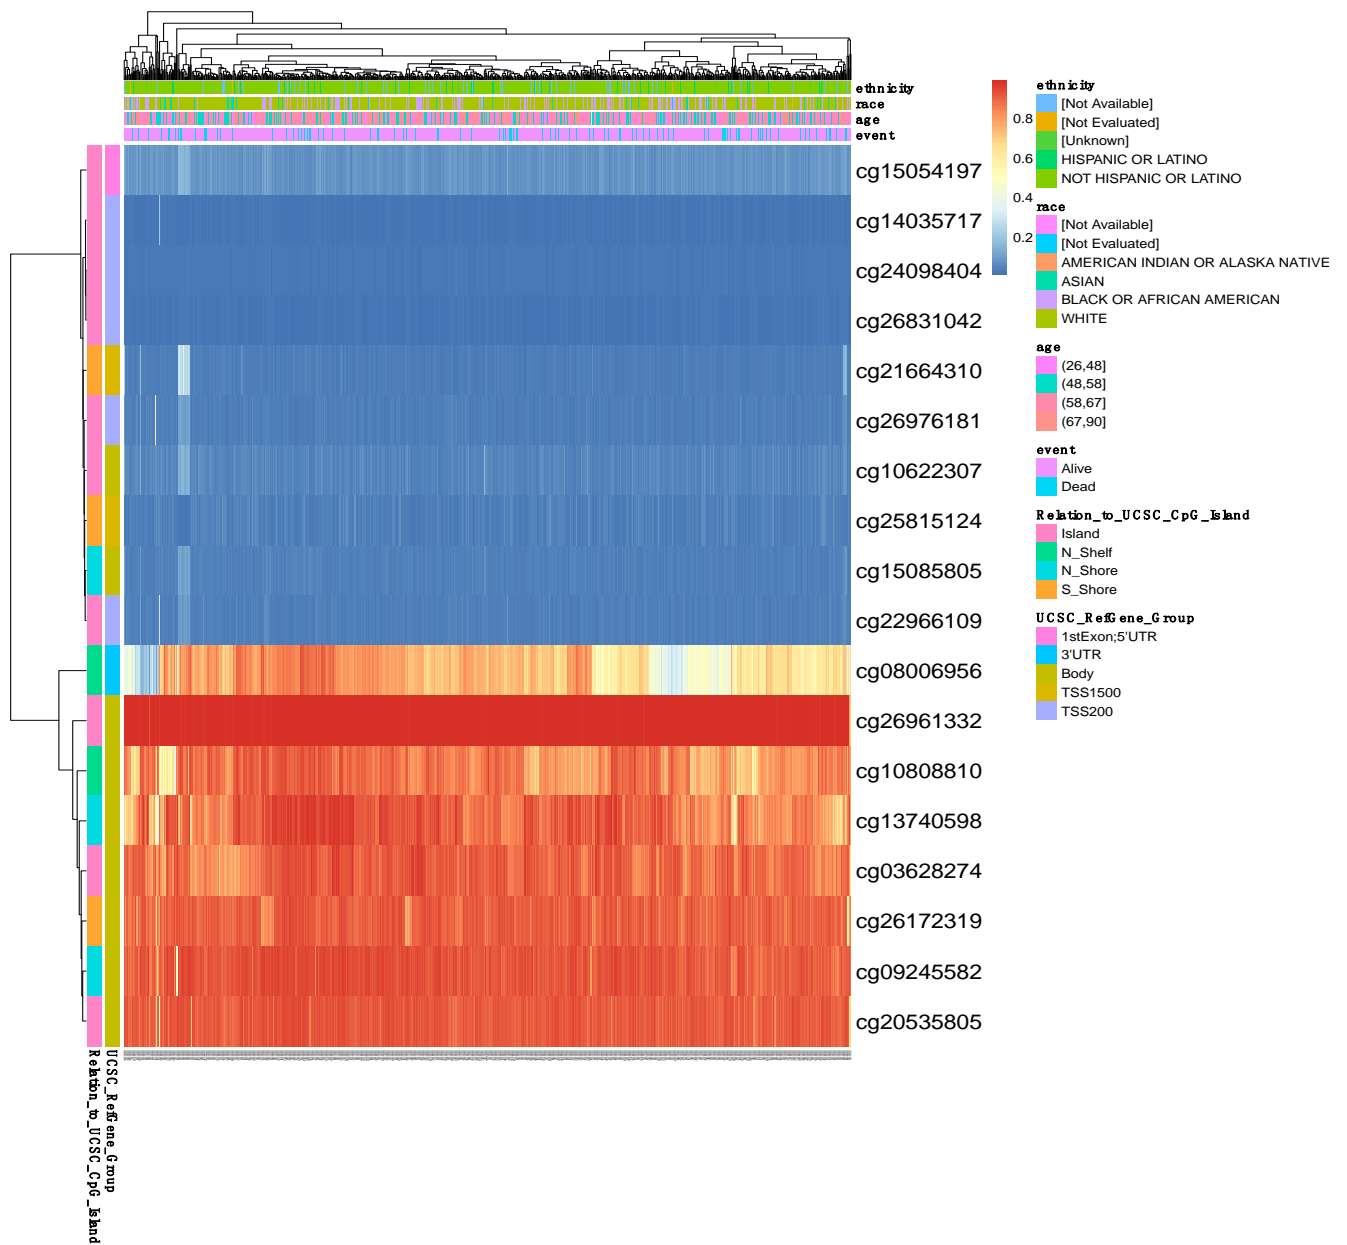

**Figure S7.** DNA methylation clustered expression of LSM4 (TCGA dataset). Blue bars indicate low expression, while red bars mean high expression. The different color side boxes denoted ethnicity, race, age, event, Relation to UCSC CpG island and UCSC RefGene Group. DNA methylation status was represented as  $\beta$ -values (ranging from 0 to 1).

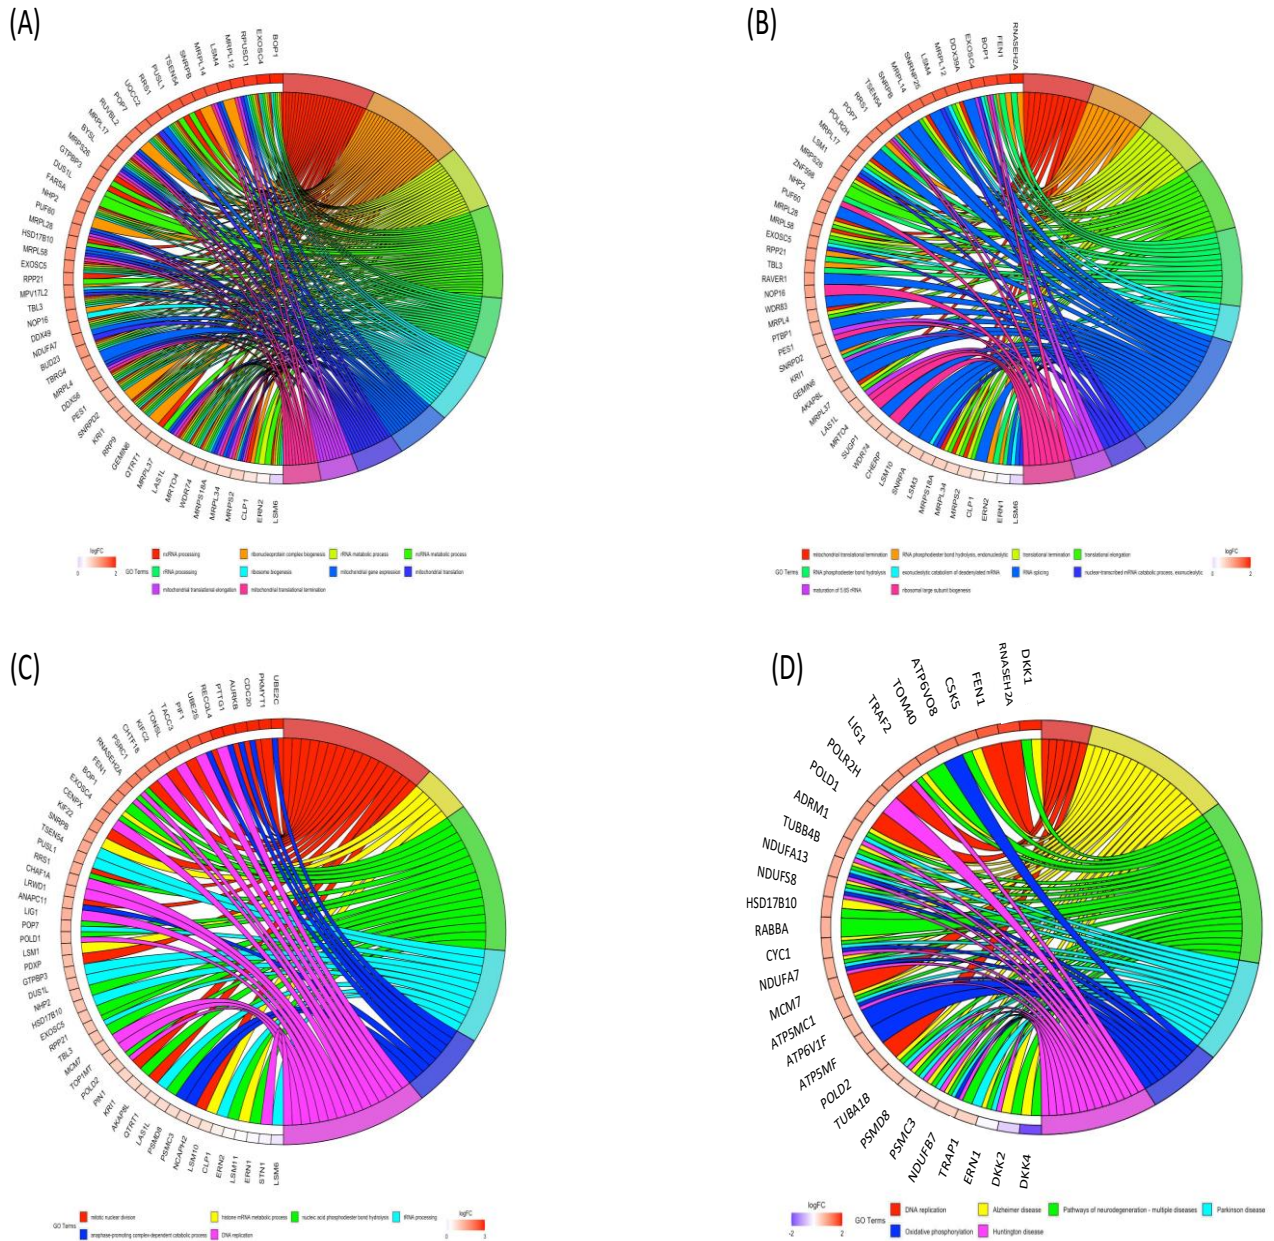

**Figure S8.** Functional enrichment analysis with gene ontology (GO) terms and KEGG of differentially expressed genes (DEGs). (A-C) Chord diagrams for biological processes, cellular components, and molecular functions, respectively. (D) KEGG terms of DEGs. The involved DEGs are shown on the left hand side of the chord plots. The red gene bars indicate upregulation, and blue ones stand for downregulation

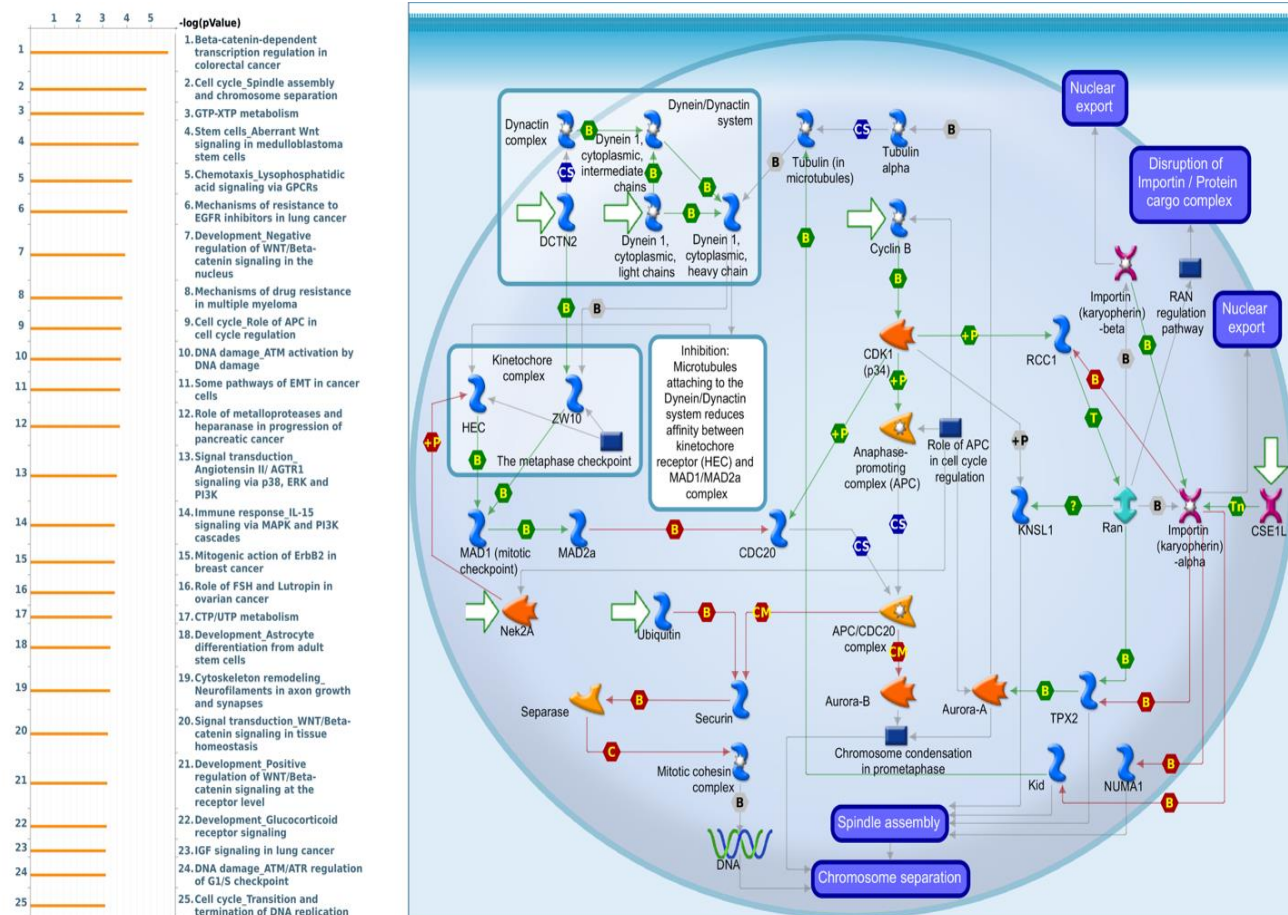

**Figure S9.** The approach was to collect the top 10% of expression gene lists from both METABRIC (2000 genes) and Pan-Cancer (1800 genes), then overlapping to a final genes list of 463 genes in total. The pathway list was ordered by the  $-\log$  P-value from the genes list extracted via TCGA Pan-Cancer atlas and METABRIC breast cancer patient databases. “Cell cycle Spindle assembly and chromosome separation” placed on top of the pathway list when performing the “biological process” analysis

**Table S1.** The basic characteristic of LSM4 gene on Oncomine database

| Gene | Dataset                    | group comparison                                                 | fold change | p-value  | number of patients |
|------|----------------------------|------------------------------------------------------------------|-------------|----------|--------------------|
| LSM4 | Curtis Breast (n=2136)     | Invasive Ductal and Invasive Lobular Breast Carcinoma vs. Normal | 2,111       | 2.64E-43 | 90/234             |
|      |                            | Mucinous Breast Carcinoma vs. Normal                             | 2,15        | 2.17E-23 | 46/190             |
|      |                            | Invasive Ductal Breast Carcinoma vs. Normal                      | 2,31        | 8.25E-91 | 1556/1700          |
|      |                            | Breast Carcinoma vs. Normal                                      | 2,05        | 1.14E-08 | 14/158             |
|      |                            | Medullary Breast Carcinoma vs. Normal                            | 2,391       | 2.61E-14 | 32/176             |
|      | TCGA breast (n=593)        | Invasive Ductal Breast Carcinoma vs. Normal                      | 2,141       | 1,02E-38 | 389/450            |
|      | Richardson Breast 2 (n=47) | Ductal Breast Carcinoma vs. Normal                               | 2,283       | 2.51E-08 | 40/47              |
|      | Ma breast 4 (n=66)         | Lobular Breast Carcinoma vs. Normal                              | 2,045       | 2.66E-07 | 9/23               |

**Table S2.** Statistical values of LSM family genes expression base on individual cancer stages

| Comparison        | P-value  |          |          |          |          |          |          |          |          |          |          |          |          |
|-------------------|----------|----------|----------|----------|----------|----------|----------|----------|----------|----------|----------|----------|----------|
|                   | LSM1     | LSM2     | LSM3     | LSM4     | LSM5     | LSM6     | LSM7     | LSM8     | LSM10    | LSM11    | LSM12    | LSM14A   | LSM14B   |
| Normal - Stage 1  | 2,79E-08 | 1,97E-12 | 3,33E-16 | 1,62E-12 | 2,48E-05 | 1,47E-09 | 1,62E-12 | 1,19E-07 | 1,62E-12 | 2,40E-01 | <1E-12   | 2,30E-02 | 1,62E-12 |
| Normal - Stage 2  | 2,22E-16 | 1,62E-12 | 1,62E-12 | 1,62E-12 | 1,62E-12 | 2,13E-09 | <1E-12   | 1,62E-12 | 1,62E-12 | 1,78E-01 | <1E-12   | 1,22E-03 | <1E-12   |
| Normal - Stage 3  | 1,00E-11 | 1,62E-12 | 1,62E-12 | 1,62E-12 | 1,68E-12 | 1,91E-12 | <1E-12   | 2,73E-11 | 3,33E-16 | 2,81E-01 | 1,11E-16 | 3,18E-01 | 1,62E-12 |
| Normal - Stage 4  | 5,03E-04 | 4,16E-04 | 1,05E-04 | 9,86E-07 | 9,04E-03 | 7,23E-04 | 1,69E-05 | 1,54E-03 | 1,79E-04 | 2,01E-01 | 2,85E-02 | 6,44E-01 | 2,26E-06 |
| Stage 1 - Stage 2 | 1,48E-02 | 3,30E-03 | 2,54E-03 | 7,80E-03 | 9,28E-01 | 2,22E-01 | 3,01E-01 | 4,38E-02 | 2,92E-01 | 9,58E-01 | 8,56E-01 | 9,91E-01 | 2,60E-03 |
| Stage 1 - Stage 3 | 4,48E-02 | 3,68E-01 | 5,14E-03 | 1,13E-01 | 4,19E-01 | 8,90E-01 | 2,89E-01 | 9,97E-01 | 6,04E-01 | 8,83E-01 | 4,36E-02 | 1,60E-01 | 5,26E-03 |
| Stage 1 - Stage 4 | 2,90E-01 | 2,33E-01 | 7,06E-01 | 1,75E-01 | 9,62E-01 | 8,56E-01 | 2,29E-01 | 5,82E-01 | 4,86E-02 | 4,67E-01 | 7,66E-02 | 2,03E-01 | 2,78E-03 |
| Stage 2 - Stage 3 | 9,49E-01 | 1,99E-02 | 5,92E-01 | 4,29E-01 | 4,99E-02 | 8,54E-02 | 8,31E-01 | 1,95E-02 | 7,63E-01 | 8,08E-01 | 6,26E-03 | 5,45E-02 | 8,31E-01 |
| Stage 2 - Stage 4 | 6,95E-01 | 9,70E-01 | 2,89E-01 | 7,46E-01 | 9,97E-01 | 5,62E-01 | 4,16E-01 | 2,56E-02 | 1,92E-01 | 4,81E-01 | 8,93E-02 | 1,89E-01 | 2,84E-01 |
| Stage 3 - Stage 4 | 6,90E-01 | 3,62E-01 | 2,09E-01 | 5,51E-01 | 4,58E-01 | 8,75E-01 | 4,71E-01 | 5,50E-01 | 2,27E-01 | 4,39E-01 | 3,34E-01 | 3,89E-01 | 2,40E-01 |

**Table S3.** Prognosis value of CpGs in LSM4 (MethSurv database)

| Name       | Cancer | HR    | CI            | P.value             | Best_split | MAPINFO  | UCSC_RefGene_Name | UCSC_RefGene_Group | Relation_to_UCSC_CpG_Island |
|------------|--------|-------|---------------|---------------------|------------|----------|-------------------|--------------------|-----------------------------|
| cg03628274 | BRCA   | 1.151 | (0.727-1.822) | 0.54869470772557    | q25        | 18420511 | LSM4              | Body               | Island                      |
| cg08006956 | BRCA   | 0.718 | (0.444-1.162) | 0.17766823143342    | q75        | 18418056 | LSM4              | 3'UTR              | N_Shelf                     |
| cg09245582 | BRCA   | 0.765 | (0.518-1.131) | 0.179847910094958   | median     | 18419467 | LSM4              | Body               | N_Shore                     |
| cg10622307 | BRCA   | 1.166 | (0.768-1.771) | 0.470449265760582   | q75        | 18433643 | LSM4              | Body               | Island                      |
| cg10808810 | BRCA   | 0.614 | (0.375-1.004) | 0.0520933372972706  | q75        | 18429665 | LSM4              | Body               | N_Shelf                     |
| cg13740598 | BRCA   | 0.595 | (0.4-0.885)   | 0.0103268375374075  | median     | 18419211 | LSM4              | Body               | N_Shore                     |
| cg14035717 | BRCA   | 0.772 | (0.512-1.165) | 0.218227334938768   | mean       | 18434138 | LSM4              | TSS200             | Island                      |
| cg15054197 | BRCA   | 0.763 | (0.512-1.139) | 0.1860680436322     | mean       | 18433911 | LSM4              | 1stExon;5'UTR      | Island                      |
| cg15085805 | BRCA   | 0.661 | (0.415-1.052) | 0.080779217494177   | q25        | 18433592 | LSM4              | Body               | N_Shore                     |
| cg20535805 | BRCA   | 0.672 | (0.454-0.994) | 0.0465587163613179  | mean       | 18420735 | LSM4              | Body               | Island                      |
| cg21664310 | BRCA   | 1.148 | (0.753-1.751) | 0.521058598421183   | q75        | 18434339 | LSM4              | TSS1500            | S_Shore                     |
| cg22966109 | BRCA   | 1.472 | (0.988-2.194) | 0.0572423874442253  | mean       | 18434177 | LSM4              | TSS200             | Island                      |
| cg24098404 | BRCA   | 1.301 | (0.877-1.929) | 0.19108487752662    | median     | 18434142 | LSM4              | TSS200             | Island                      |
| cg25815124 | BRCA   | 0.853 | (0.539-1.351) | 0.498113218997267   | q25        | 18434238 | LSM4              | TSS1500            | S_Shore                     |
| cg26172319 | BRCA   | 1.09  | (0.736-1.615) | 0.666996595435314   | median     | 18421854 | LSM4              | Body               | S_Shore                     |
| cg26831042 | BRCA   | 0.629 | (0.378-1.047) | 0.0744852943406927  | q75        | 18434038 | LSM4              | TSS200             | Island                      |
| cg26961332 | BRCA   | 0.564 | (0.379-0.84)  | 0.00480201118681822 | median     | 18420631 | LSM4              | Body               | Island                      |
| cg26976181 | BRCA   | 1.396 | (0.864-2.257) | 0.172953747405131   | q25        | 18434160 | LSM4              | TSS200             | Island                      |

MAPINFO represents chromosome and position information; pvalue is calculated through the Wilcoxon rank-sum test followed by FDR (false discovery rate) adjustment for multiple corrections.

**Table S4.** Gene sets enriched in high expression LSM4

| NAME                                       | SIZE | ES         | NES        | NOM p-val    | FDR q-val    | FWER p-val | RANK AT MAX |
|--------------------------------------------|------|------------|------------|--------------|--------------|------------|-------------|
| HALLMARK_EPITHELIAL_MESENCHYMAL_TRANSITION | 184  | 0.55581105 | 36.345.425 | 0.0          | 0.0          | 0.0        | 3918        |
| HALLMARK_UV_RESPONSE_DN                    | 130  | 0.46894485 | 29.184.568 | 0.0          | 0.0          | 0.0        | 4609        |
| HALLMARK_KRAS_SIGNALING_UP                 | 178  | 0.37147906 | 2.444.795  | 0.0          | 0.0          | 0.0        | 3930        |
| HALLMARK_MYOGENESIS                        | 190  | 0.32343954 | 213.766    | 0.0          | 4.46E+03     | 0.002      | 3887        |
| HALLMARK_COAGULATION                       | 126  | 0.32323095 | 19.785.095 | 0.0          | 0.0015085542 | 0.007      | 3890        |
| HALLMARK_TGF_BETA_SIGNALING                | 52   | 0.38005242 | 19.463.059 | 0.0          | 0.0014065536 | 0.008      | 4190        |
| HALLMARK_TNFA_SIGNALING_VIA_NFKB           | 185  | 0.27296796 | 18.122.653 | 0.0          | 0.0031423587 | 0.021      | 4705        |
| HALLMARK_ANGIOGENESIS                      | 35   | 0.3844226  | 17.665.083 | 0.0088495575 | 0.0050957585 | 0.04       | 4443        |
| HALLMARK_ESTROGEN_RESPONSE_EARLY           | 179  | 0.2626482  | 17.251.546 | 0.0          | 0.0073388377 | 0.063      | 5058        |
| HALLMARK_APICAL_JUNCTION                   | 181  | 0.25376558 | 16.609.256 | 0.0          | 0.011154205  | 0.105      | 4688        |
| HALLMARK_ANDROGEN_RESPONSE                 | 88   | 0.2790822  | 15.872.321 | 0.006329114  | 0.01916953   | 0.185      | 4020        |
| HALLMARK_WNT_BETA_CATENIN_SIGNALING        | 41   | 0.33050233 | 15.634.063 | 0.039697543  | 0.021157784  | 0.218      | 3994        |
| HALLMARK_NOTCH_SIGNALING                   | 30   | 0.34037733 | 14.941.674 | 0.046092186  | 0.036435455  | 0.347      | 4222        |
| HALLMARK_IL2_STATS_SIGNALING               | 176  | 0.22726999 | 14.850.502 | 0.013245033  | 0.03708512   | 0.379      | 5227        |
| HALLMARK_INFLAMMATORY_RESPONSE             | 188  | 0.22321622 | 14.768.684 | 0.01934236   | 0.03659096   | 0.399      | 3883        |
| HALLMARK_HEDGEHOG_SIGNALING                | 32   | 0.33398    | 14.532.586 | 0.06720977   | 0.039944455  | 0.451      | 4571        |
| HALLMARK_ESTROGEN_RESPONSE_LATE            | 187  | 0.18929738 | 12.537.602 | 0.07114624   | 0.1604038    | 0.937      | 4872        |
| HALLMARK_P53_PATHWAY                       | 177  | 0.18405075 | 12.002.507 | 0.13097712   | 0.21183962   | 0.978      | 5146        |
| HALLMARK_APICAL_SURFACE                    | 38   | 0.2510013  | 11.657.314 | 0.2371134    | 0.25003025   | 0.993      | 3104        |
| HALLMARK_HYPOXIA                           | 176  | 0.16956826 | 1.106.618  | 0.23540856   | 0.33509856   | 0.998      | 5323        |
| HALLMARK_XENOBIOTIC_METABOLISM             | 187  | 0.16728139 | 11.008.854 | 0.252505     | 0.3304838    | 0.998      | 5129        |
| HALLMARK_APOPTOSIS                         | 152  | 0.16951863 | 10.851.682 | 0.26104417   | 0.34244183   | 0.998      | 4398        |
| HALLMARK_PANCREAS_BETA_CELLS               | 38   | 0.22809084 | 10.713.276 | 0.33333334   | 0.35183182   | 0.999      | 4196        |
| HALLMARK_COMPLEMENT                        | 184  | 0.15990062 | 10.614.573 | 0.30103093   | 0.356137     | 0.999      | 5461        |
| HALLMARK_ALLOGRAFT_REJECTION               | 180  | 0.15927535 | 1.040.058  | 0.34631148   | 0.38013163   | 1.0        | 5238        |
| HALLMARK_KRAS_SIGNALING_DN                 | 171  | 0.14032325 | 0.90302485 | 0.6806723    | 0.65641874   | 1.0        | 4386        |

**Table S5.** Pathway analysis of LSM4-coexpressed genes from public breast cancer databases using the MetaCore database (p<0.01 set as the cutoff value)

| # | Maps                                                                 | pValue    | Network Objects from Active Data                                                                 |
|---|----------------------------------------------------------------------|-----------|--------------------------------------------------------------------------------------------------|
| 1 | Beta-catenin-dependent transcription regulation in colorectal cancer | 2,027E-06 | CD44, ELAVL1 (HuR), CD44 soluble, TCF7L2 (TCF4), MDR1, YAP1 (YAp65), CD44 (EXT)                  |
| 2 | Cell cycle_Spindle assembly and chromosome separation                | 1,687E-05 | Aurora-B, Kid, CDC20, Tubulin alpha, Securin, Tubulin (in microtubules)                          |
| 3 | GTP-XTP metabolism                                                   | 2,130E-05 | POLR2J, NDPK A, RRP41, RPOM, RRP46, RPB8, IMD1, RPA16, RPA39                                     |
| 4 | Stem cells_Aberrant Wnt signaling in medulloblastoma stem cells      | 3,532E-05 | CD44, DAB2, Axin1, Axin, TCF7L2 (TCF4)                                                           |
| 5 | Chemotaxis_Lysophosphatidic acid signaling via GPCRs                 | 6,842E-05 | LPAR2, FKHR, 4E-BP1, MEK1/2, Tcf(Lef), Rho GTPase, H-Ras, YAP1 (YAp65), G-protein gamma 12, PRK1 |

|    |                                                                              |           |                                                                         |
|----|------------------------------------------------------------------------------|-----------|-------------------------------------------------------------------------|
| 6  | Mechanisms of resistance to EGFR inhibitors in lung cancer                   | 1,047E-04 | HSP90, 4E-BP1, TCF8, H-Ras, Survivin, MEK2(MAP2K2)                      |
| 7  | Development_Negative regulation of WNT/Beta-catenin signaling in the nucleus | 1,316E-04 | NARF, PJA2, RUVBL2, Tcf(Lef), Axin, TCF7L2 (TCF4), Menin, Histone H1    |
| 8  | Mechanisms of drug resistance in multiple myeloma                            | 1,699E-04 | CD44, MEK1/2, GCR Alpha, H-Ras, TCF7L2 (TCF4), MDR1                     |
| 9  | Cell cycle_Role of APC in cell cycle regulation                              | 1,867E-04 | Tome-1, Aurora-B, Kid, CDC20, Securin                                   |
| 10 | DNA damage_ATM activation by DNA damage                                      | 1,953E-04 | HSP90, OBFC2B, TELO2, RecQL4, Histone H2AX, PP2A regulatory, CDK5       |
| 11 | Some pathways of EMT in cancer cells                                         | 2,128E-04 | JAK1, 4E-BP1, TRAF2, Axin, H-Ras, PDGF-D                                |
| 12 | Role of metalloproteases and heparanase in progression of pancreatic cancer  | 2,170E-04 | CD44, CD44 soluble, H-Ras, MEK2(MAP2K2), CD44 (EXT)                     |
| 13 | Signal transduction_Angiotensin II/AGTR1 signaling via p38, ERK and PI3K     | 2,958E-04 | ELAVL1 (HuR), FKHR, 4E-BP1, MEK1/2, p70 S6 kinases, RECK, H-Ras, PDGF-D |
| 14 | Immune response_IL-15 signaling via MAPK and PI3K cascades                   | 3,575E-04 | JAK1, FKHR, MEK1/2, TRAF2, p70 S6 kinases, H-Ras                        |
| 15 | Mitogenic action of ErbB2 in breast cancer                                   | 3,575E-04 | FKHR, MEK1/2, p70 S6 kinase2, H-Ras, NUMB, TCF7L2 (TCF4)                |
| 16 | Role of FSH and Lutropin in ovarian cancer                                   | 3,575E-04 | CD44, FKHR, MEK1/2, SLIT2, Survivin, ITGAV                              |
| 17 | CTP/UTP metabolism                                                           | 4,683E-04 | POLR2J, NDPK A, RRP41, RPOM, RRP46, RPB8, RPA16, RPA39                  |
| 18 | Development_Astrocyte differentiation from adult stem cells                  | 5,464E-04 | JAK1, CD44, MEK1/2, H-Ras, BMP receptor 2                               |
| 19 | Cytoskeleton remodeling_Neurofilaments in axon growth and synapses           | 5,555E-04 | MEK1/2, BPAG1, CDK5, Tubulin (in microtubules)                          |
| 20 | Signal transduction_WNT/Beta-catenin signaling in tissue homeostasis         | 6,872E-04 | FKHR, Tcf(Lef), TCF7L2 (TCF4), Survivin, Versican                       |

|    |                                                                                      |           |                                                                           |
|----|--------------------------------------------------------------------------------------|-----------|---------------------------------------------------------------------------|
| 21 | Development_Positive regulation of WNT/Beta-catenin signaling at the receptor level  | 7,377E-04 | CD44, ELAVL1 (HuR), Rab8B, MEK1/2, Tcf(Lef), RECK                         |
| 22 | Development_Glucocorticoid receptor signaling                                        | 7,727E-04 | HSP90, GCR, GCR Alpha, GCR Beta                                           |
| 23 | IGF signaling in lung cancer                                                         | 8,535E-04 | 4E-BP1, Histone H2AX, H-Ras, Survivin, MEK2(MAP2K2)                       |
| 24 | DNA damage_ATM/ATR regulation of G1/S checkpoint                                     | 8,535E-04 | ELAVL1 (HuR), Histone H2AX, PP2A regulatory, p70 S6 kinases, MEK2(MAP2K2) |
| 25 | Cell cycle_Transition and termination of DNA replication                             | 9,011E-04 | POLD reg (p50), FEN1, POLD cat (p125), DNA ligase I                       |
| 26 | Transcription_Negative regulation of HIF1A function                                  | 1,100E-03 | HSP90, RUVBL2, Sirtuin7, MCM7, Elongin C, Elongin B                       |
| 27 | Canonical Leptin pathways in breast cancer                                           | 1,157E-03 | MEK1/2, Tcf(Lef), Axin, H-Ras, Survivin                                   |
| 28 | Canonical Notch signaling pathway in colorectal cancer                               | 1,157E-03 | CD44, 4E-BP1, NUMB, TCF7L2 (TCF4), Survivin                               |
| 29 | ATP/ITP metabolism                                                                   | 1,175E-03 | POLR2J, NDPK A, RRP41, RPOM, RRP46, RPB8, RPA16, RPA39                    |
| 30 | Stellate cells activation and liver fibrosis                                         | 1,186E-03 | DAB2, TRAF2, Tcf(Lef), TGF-beta receptor type II, H-Ras, MEK2(MAP2K2)     |
| 31 | Histone deacetylases in Prostate Cancer                                              | 1,376E-03 | HSP90, FKHR, Sirtuin7, Tubulin alpha                                      |
| 32 | Immune response_IL-2 signaling via ERK, PI3K, and PLC-gamma                          | 1,476E-03 | JAK1, 4E-BP1, MEK1/2, p70 S6 kinase2, p70 S6 kinases, H-Ras               |
| 33 | Immune response_BAFF-induced signaling                                               | 1,677E-03 | FKHR, 4E-BP1, MEK1/2, TRAF2, TRIM2                                        |
| 34 | Inflammatory factors-induced expression of mucins in normal and asthmatic epithelium | 1,677E-03 | JAK1, H-Ras, SF4, MEK2(MAP2K2), PGES2                                     |
| 35 | NETosis in SLE                                                                       | 1,775E-03 | Histone H2, Histone H2A, Pin1, Histone H1                                 |
| 36 | IL-6 signaling in breast cancer cells                                                | 1,994E-03 | JAK1, MEK1/2, H-Ras, MDR1, Survivin                                       |

|    |                                                                                                          |           |                                                                        |
|----|----------------------------------------------------------------------------------------------------------|-----------|------------------------------------------------------------------------|
| 37 | Translation_Translation regulation by Alpha-1 adrenergic receptors                                       | 1,994E-03 | 4E-BP1, p70 S6 kinase2, H-Ras, MEK2(MAP2K2), PRK1                      |
| 38 | Cell cycle_Role of Nek in cell cycle regulation                                                          | 2,002E-03 | Tubulin beta, Tubulin alpha, Histone H1, Tubulin (in microtubules)     |
| 39 | Cytoskeleton remodeling_Reverse signaling by Ephrin-B                                                    | 2,002E-03 | Axin, H-Ras, Tubulin alpha, Tubulin (in microtubules)                  |
| 40 | Translation_Regulation of EIF4F activity                                                                 | 2,167E-03 | 4E-BP1, p70 S6 kinase2, TGF-beta receptor type II, H-Ras, MEK2(MAP2K2) |
| 41 | Development_HGF-dependent inhibition of TGF-beta-induced EMT                                             | 2,514E-03 | TGF-beta receptor type II, H-Ras, MEK2(MAP2K2), PGES2                  |
| 42 | Development_S1P1 receptor signaling via beta-arrestin                                                    | 2,514E-03 | p70 S6 kinase2, p70 S6 kinases, H-Ras, MEK2(MAP2K2)                    |
| 43 | Development_CNTF receptor signaling                                                                      | 2,514E-03 | JAK1, p70 S6 kinase2, H-Ras, MEK2(MAP2K2)                              |
| 44 | Development_Negative regulation of WNT/Beta-catenin signaling in the cytoplasm                           | 2,678E-03 | ELAVL1 (HuR), DAB2, Tcf(Lef), Axin, YAP1/TAZ, YAP1 (YAp65)             |
| 45 | Androgen receptor activation and downstream signaling in Prostate cancer                                 | 2,681E-03 | JAK1, GCR, NCOA3 (pCIP/SRC3), H-Ras, MEK2(MAP2K2), FEN1, Versican      |
| 46 | Role of growth factor receptors transactivation by Hyaluronic acid / CD44 signaling in tumor progression | 2,802E-03 | CD44, MEK1/2, H-Ras, MDR1                                              |
| 47 | Signal transduction_IGF-1 receptor signaling pathway                                                     | 2,973E-03 | JAK1, FKHR, 4E-BP1, MEK1/2, H-Ras                                      |
| 48 | Cytoskeleton remodeling_Keratin filaments                                                                | 3,110E-03 | Tubulin beta, BPAG1, Tubulin alpha, Tubulin (in microtubules)          |
| 49 | IGF-1 signaling in pancreatic cancer                                                                     | 3,110E-03 | JAK1, H-Ras, NUA1, MEK2(MAP2K2)                                        |
| 50 | WNT signaling in gastric cancer                                                                          | 3,110E-03 | CD44, Tcf(Lef), Axin, TCF7L2 (TCF4)                                    |
